# Supplementary material for: Target Identification of 22-(4-Pyridinecarbonyl) Jorunnamycin A, a Tetrahydroisoquinoline Derivative from the Sponge Xestospongia sp., in Mediating Non-Small-Cell Lung Cancer Cell Apoptosis
Source: MDPI journal article supplement (doi:10.3390/molecules27248948), 2022-12-15
Supplement: s1 [file s1]

***Supplementary information for***

**Target identification of 22-(4-pyridinecarbonyl) jorunnamycin A, a tetrahydroisoquinoline derivative from the sponge *Xestospongia* sp., in mediating non-small cell lung cancer cell apoptosis**

Iksen Iksen<sup>1</sup>, Suwimon Sinsook<sup>2,3</sup>, Onsurang Wattanathamsan<sup>1</sup>, Koonchira Buaban<sup>3,4</sup>, Supakarn Chamni<sup>3,4</sup>, Varisa Pongrakhananon<sup>1, 5 \*</sup>

<sup>1</sup> Department of Pharmacology and Physiology, Faculty of Pharmaceutical Sciences, Chulalongkorn University, Bangkok, 10330 Thailand

<sup>2</sup> Pharmaceutical Sciences and Technology Program, Faculty of Pharmaceutical Sciences, Chulalongkorn University, Bangkok 10330, Thailand

<sup>3</sup> Department of Pharmacognosy and Pharmaceutical Botany, Faculty of Pharmaceutical Sciences, Chulalongkorn University, Bangkok 10330, Thailand

<sup>4</sup> Natural Products and Nanoparticles Research Unit (NP2), Chulalongkorn University, Bangkok 10330, Thailand

<sup>5</sup> Preclinical Toxicity and Efficacy, Assessment of Medicines and Chemicals Research Unit, Chulalongkorn University, Bangkok, 10330 Thailand

**\*Corresponding author**

Varisa Pongrakhananon, Department of Pharmacology and Physiology,  
Faculty of Pharmaceutical Sciences, Chulalongkorn University, 254 Phayathai, Wangmai,  
Pathumwan, Bangkok, Thailand 10330

Tel: +662-218-8325; Fax: +662-218-8340

Email: Varisa.p@pharm.chula.ac.th

## **1. Supplementary Materials and Methods**

### *1.1 Cell culture*

Lung epithelial BEAS-2B cells were obtained from the American Type Culture Collection (ATCC, Virginia, USA). Cells were cultured in Dulbecco's modified Eagle's medium (DMEM). All media were supplemented with 10% fetal bovine serum (FBS), 100 U/mL penicillin–streptomycin antibiotic solution and 2 mM L-glutamine. Cells were maintained in a 37 °C humidified incubator with 5% CO<sub>2</sub>.

## 2. Supplementary Figures and Tables

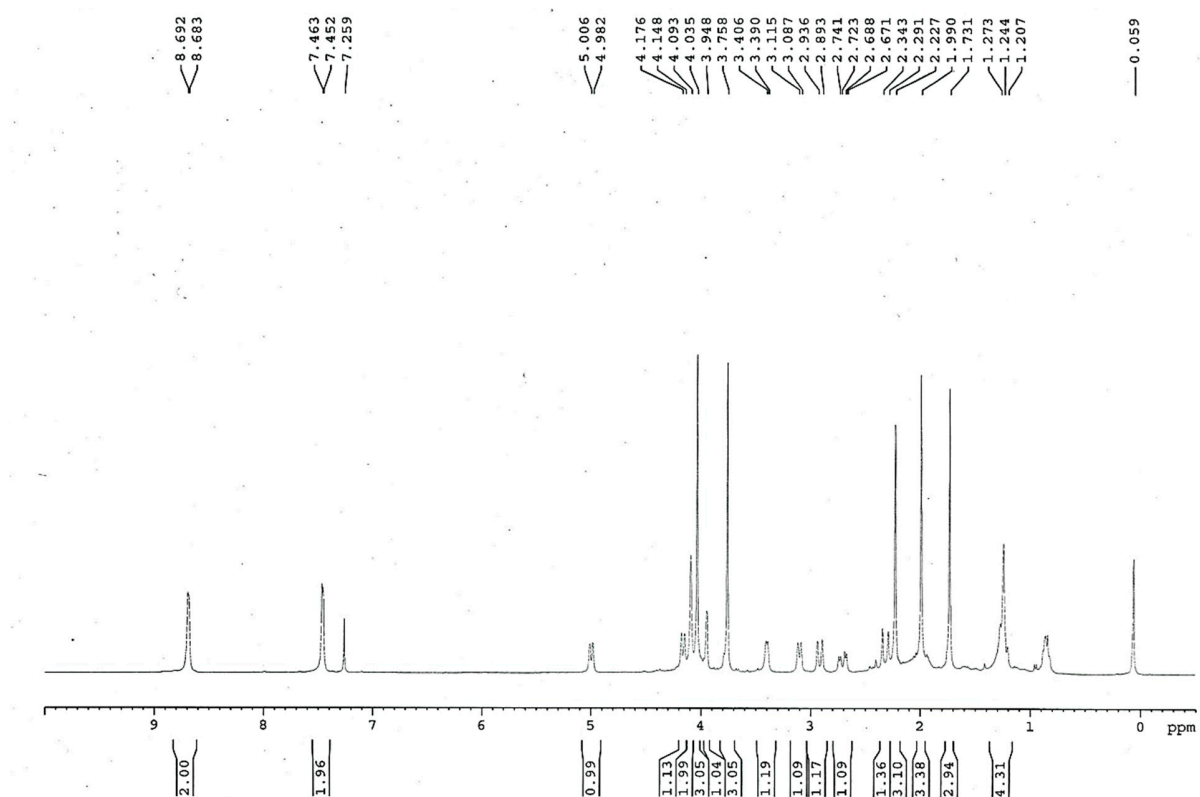

**Figure S1.**  $^1\text{H}$  NMR (400 MHz) spectrum of 22-(4'py)-JA (12 mg) in  $\text{CDCl}_3$ .  $^1\text{H}$ -NMR ( $\text{CDCl}_3$ , 400 MHz)  $\delta$  in ppm: 8.68 (2H, d,  $J = 3.6$  Hz, 2'-H, 6'-H), 7.47 (2H, d,  $J = 4.4$  Hz, 3'-H, 5'-H), 4.99 (1H, d,  $J = 9.6$  Hz, 22-Ha), 4.16 (1H, d,  $J = 11.2$  Hz, 22-Hb), 4.09 (1H, s, 21-H, 1-H), 4.04 (3H, s, 7- $\text{OCH}_3$ ), 3.95 (1H, s, 11-H), 3.76 (3H, s, 17- $\text{OCH}_3$ ), 3.40 (1H, d,  $J = 6.4$  Hz, 13-H), 3.10 (1H, d,  $J = 11.2$  Hz, 3-H), 2.92 (1H, d,  $J = 17.2$  Hz, 4-Ha), 2.71 (1H, dd,  $J = 21.2, 7.2$  Hz, 14-Ha), 2.34 (1H, d,  $J = 20.8$  Hz, 14-Hb), 2.23 (3H, s,  $\text{NCH}_3$ ), 1.99 (3H, s, 6- $\text{CH}_3$ ), 1.73 (3H, s, 16- $\text{CH}_3$ ), 1.24 (1H, overlapped, 4-Hb)

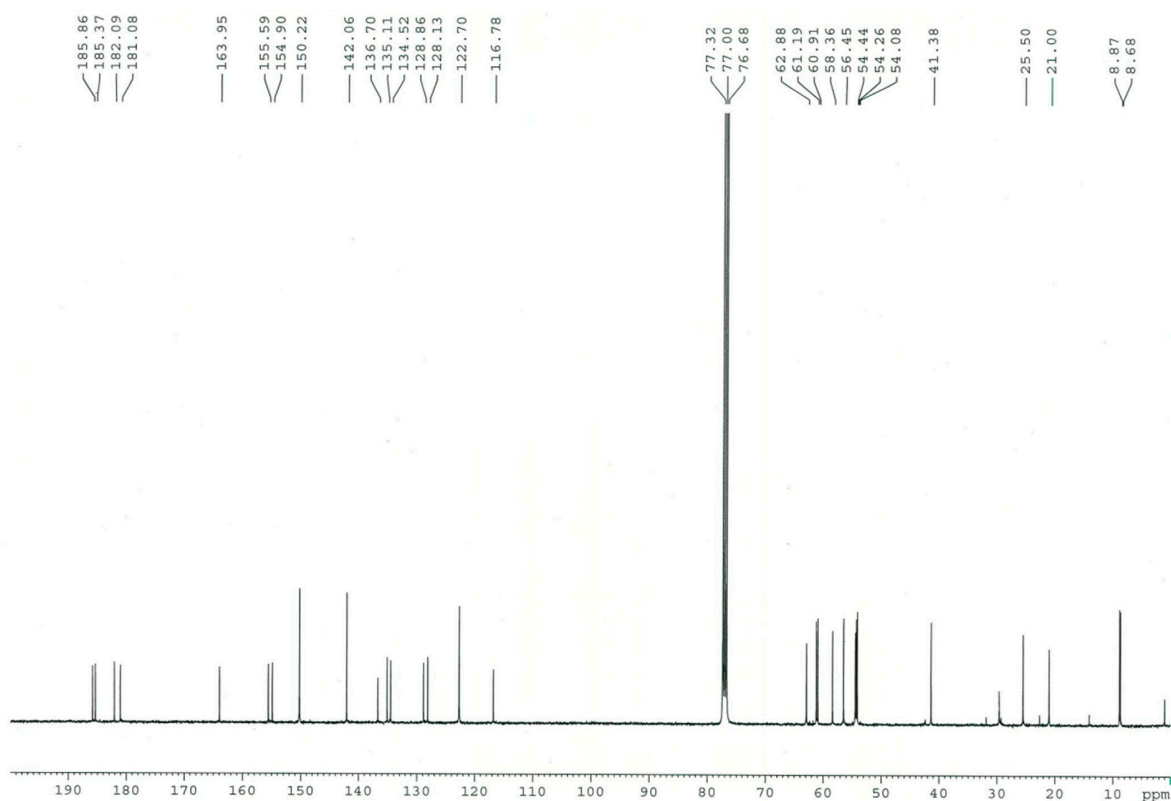

**Figure S2.** <sup>13</sup>C NMR (100 MHz) spectrum of 22-(4'py)-JA (12 mg) in CDCl<sub>3</sub>. <sup>13</sup>C-NMR (CDCl<sub>3</sub>, 100 MHz) δ in ppm: 185.9 (C-15), 185.4 (C-5), 182.1 (C-18), 181.1 (C-8), 163.9 (C-24), 155.6 (C-7), 154.9 (C-17), 150.2 (C-2C, C-6C), 142.1 (C-10), 142.1 (C-20), 136.7 (C-1C), 135.1 (C-9), 134.5 (C-19), 128.9 (C-6), 128.1 (C-16), 122.7 (C-3C, C-5C), 116.8 (21-CN), 62.9 (C-22), 61.2 (17-OCH<sub>3</sub>), 60.9 (7-OCH<sub>3</sub>), 58.4 (C-21), 56.5 (C-1), 54.4 (C-13), 54.3 (C-3), 54.1 (C-11), 41.4 (NCH<sub>3</sub>), 25.5 (C-4), 21.0 (C-14), 8.9 (6-CH<sub>3</sub>), 8.7 (16-CH<sub>3</sub>).

### A High resolution-ESI-MS

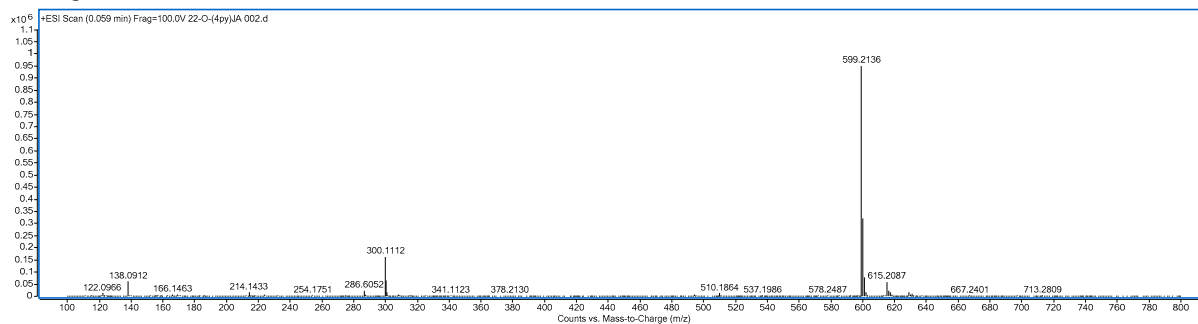

### B MS-MS profile

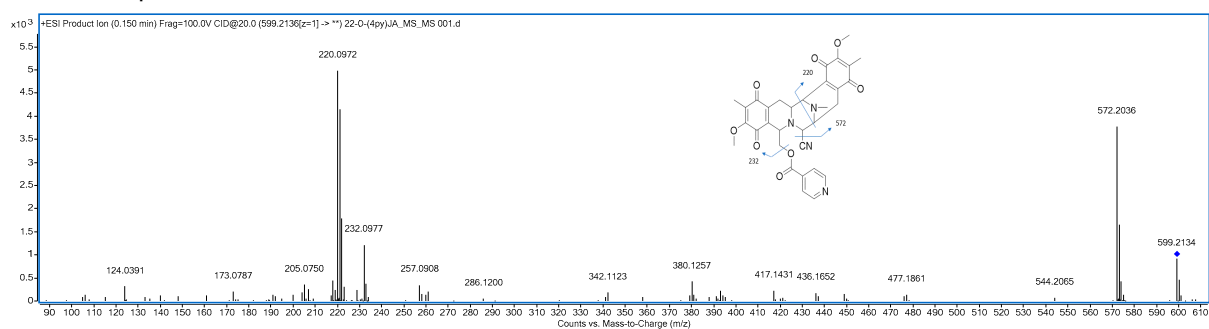

**Figure S3** High resolution-ESI-MS of 22-(4'py)-JA; (A) HR-ESI-MS calculated for  $C_{32}H_{31}N_4O_8$ ,  $m/z$  599.2136  $[M+H]^+$ , observed  $m/z$  599.2136. (B) MS-MS profile found  $m/z$  599.2134, 572.2036, 232.0977, 220.0972.

### A Positive mode

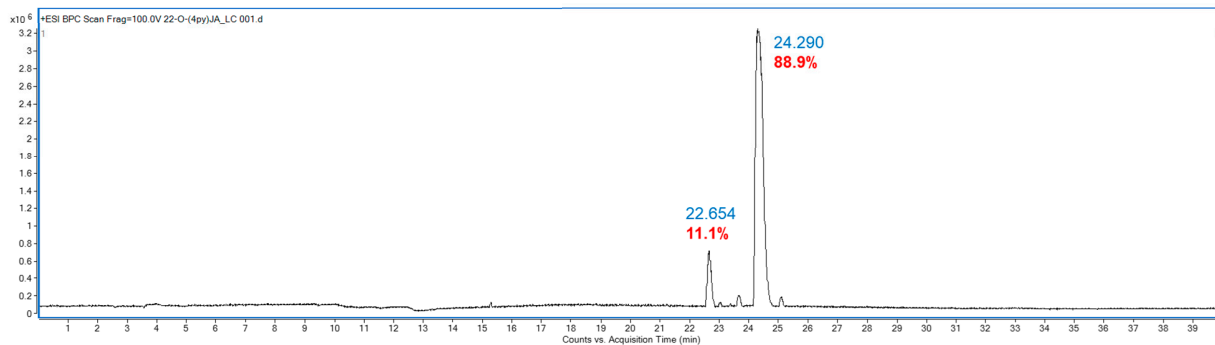

### B Negative mode

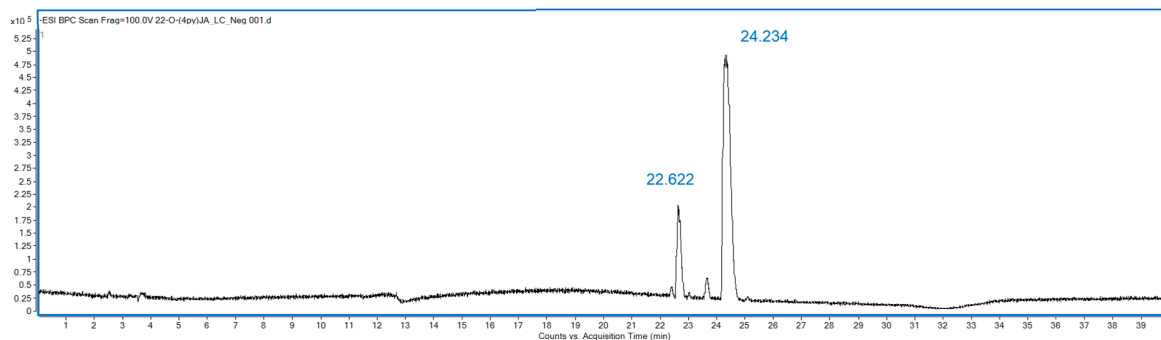

**Figure S4.** Purity analysis of 22-(4'py)-JA by LC-MS; (A) Positive mode. (B) Negative mode. Percent purity based on LC-MS positive mode is 88.9%. LC-MS condition: TOF/Q-TOF Mass Spectrometer G6540B Agilent, Gas Flow 10 L/min, Nebulizer 30 psig, Eject Speed 200.0  $\mu\text{L}/\text{min}$ , Injection Volume 10.00  $\mu\text{L}$ , Flow 0.500 mL/min, Solvent A 0.1% formic acid in  $\text{H}_2\text{O}$ . 0.1% formic acid in MeOH: Acetonitrile (1:1 v/v), 40 min.



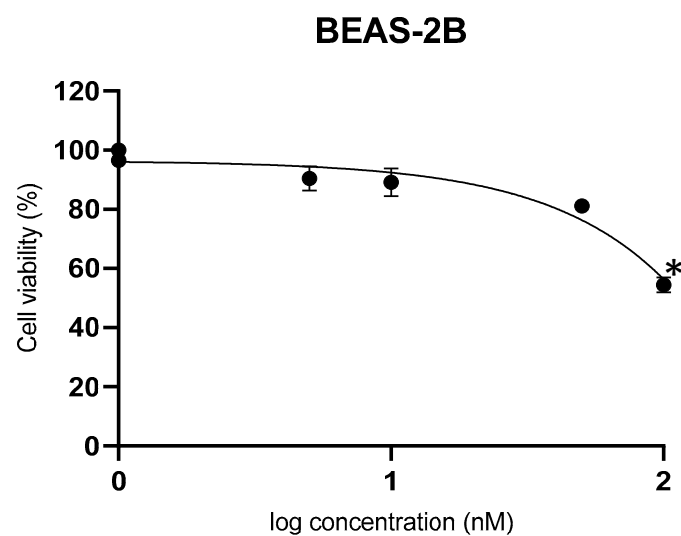

**Figure S6.** Cytotoxicity of 22-(4'py)-JA in normal lung epithelial BEAS-2B cells. BEAS-2B cells were treated with 22-(4'py)-JA for 48 h. Cytotoxic effects of 22-(4'py)-JA were evaluated by MTT assay and represented as a percentage of cell viability. Data are the mean  $\pm$  SD ( $n = 3$ ).

\* $p < 0.05$  vs. untreated control cells.



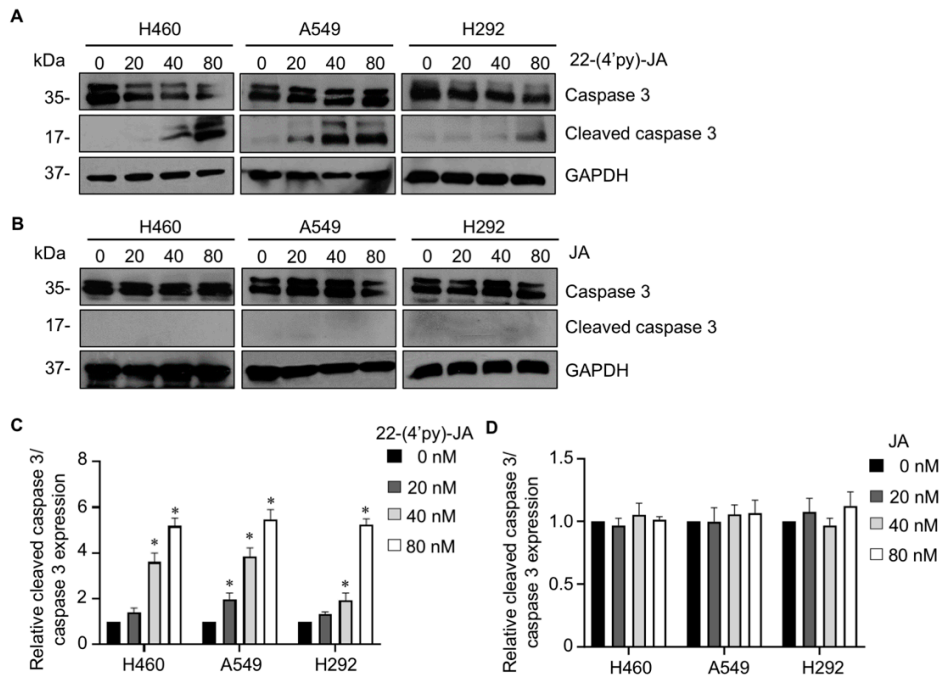

**Figure S7.** The effect of 22-(4'py)-JA and JA on caspase-3 activation. H460, A549, and H292 cells were incubated with either 22-(4'py)-JA (A) or JA (B) for 24 h. The expression levels of cleaved caspase-3 and total caspase-3 were analyzed by immunoblotting. Blots were reprobed with anti-GAPDH as a loading control. Representative blots from triplicate independent experiments are shown. Densitometry analyses of protein expression from the treatment of 22-(4'py)-JA (C) and JA (D) were performed and presented as a relative value to the control group. Data are the mean  $\pm$  SD ( $n = 3$ ). \* $p < 0.05$  vs. untreated control cells.

**Table S1.** List of potential targets of 22-(4'py)-JA from SwissTargetPrediction.

|         |        |        |        |         |
|---------|--------|--------|--------|---------|
| ABCB1   | CDK9   | HCRT2  | MAPK3  | PDE7A   |
| ABCC1   | CFD    | HDAC1  | MAPK8  | PDPK1   |
| ADAM17  | CFTR   | HDAC10 | MAPK9  | PFKFB3  |
| ADORA1  | CTSB   | HDAC11 | MLNR   | PIK3CA  |
| ADORA2A | CTSK   | HDAC2  | MMP13  | PIK3CD  |
| ADRA1A  | CTSL   | HDAC3  | MMP2   | PLA2G7  |
| ADRA1B  | CTSV   | HDAC6  | MMP3   | PLAT    |
| ADRA1D  | DGAT1  | HDAC8  | MMP8   | PRKDC   |
| AGTR1   | DHFR   | HTR1A  | MMP9   | PTK2    |
| AURKA   | DHODH  | IGF1R  | MTOR   | RPS6KA3 |
| CAPN1   | DRD4   | JAK2   | MYLK   | S1PR3   |
| CCKAR   | EGFR   | KDR    | P2RX3  | SCARB1  |
| CCKBR   | ELANE  | KLKB1  | PAK4   | SLC33A1 |
| CCND1   | ERBB2  | KNG1   | PARP1  | SLC6A4  |
| CDK1    | F2     | LGMN   | PDE10A | SRC     |
| CDK2    | F10    | MAP2K1 | PDE2A  | SSTR3   |
| CDK4    | FNTA   | MAP3K7 | PDE4A  | SYK     |
| CDK5    | GABRA5 | MAPK1  | PDE4B  | TGM2    |
| CDK5R1  | GSK3B  | MAPK10 | PDE4D  | TTK     |
| CDK7    | HCRT1  | MAPK14 | PDE5A  | TYMS    |

**Table S2.** Core targets of 22-(4'py)-JA against non-small cell lung cancer were ranked according to the degree values. The top 26 targets are highlighted in grey.

| No | Name   | Degree | Average Shortest Path Length | Betweenness Centrality | Closeness Centrality | Clustering Coefficient |
|----|--------|--------|------------------------------|------------------------|----------------------|------------------------|
| 1  | SRC    | 44     | 1.460526316                  | 0.190924974            | 0.684684685          | 0.287526427            |
| 2  | MAPK3  | 37     | 1.565789474                  | 0.094593765            | 0.638655462          | 0.334834835            |
| 3  | EGFR   | 34     | 1.605263158                  | 0.066548491            | 0.62295082           | 0.390374332            |
| 4  | CCND1  | 33     | 1.631578947                  | 0.048820227            | 0.612903226          | 0.450757576            |
| 5  | MAPK1  | 33     | 1.592105263                  | 0.093617362            | 0.628099174          | 0.380681818            |
| 6  | MTOR   | 32     | 1.657894737                  | 0.044310966            | 0.603174603          | 0.471774194            |
| 7  | MMP9   | 31     | 1.671052632                  | 0.067337048            | 0.598425197          | 0.397849462            |
| 8  | ERBB2  | 28     | 1.697368421                  | 0.028185505            | 0.589147287          | 0.494708995            |
| 9  | MMP2   | 27     | 1.75                         | 0.031940748            | 0.571428571          | 0.415954416            |
| 10 | CDK4   | 25     | 1.776315789                  | 0.033334762            | 0.562962963          | 0.45                   |
| 11 | MAP2K1 | 25     | 1.763157895                  | 0.019332587            | 0.567164179          | 0.506666667            |
| 12 | MAPK14 | 23     | 1.789473684                  | 0.013198592            | 0.558823529          | 0.517786561            |
| 13 | PIK3CA | 23     | 1.828947368                  | 0.0100228              | 0.54676259           | 0.56916996             |
| 14 | PTK2   | 23     | 1.776315789                  | 0.016695575            | 0.562962963          | 0.553359684            |
| 15 | HDAC1  | 22     | 1.828947368                  | 0.02580054             | 0.54676259           | 0.437229437            |
| 16 | CDK2   | 21     | 1.855263158                  | 0.028638091            | 0.539007092          | 0.428571429            |
| 17 | GSK3B  | 21     | 1.828947368                  | 0.012331244            | 0.54676259           | 0.514285714            |
| 18 | MAPK8  | 20     | 1.842105263                  | 0.00632414             | 0.542857143          | 0.636842105            |
| 19 | PARP1  | 20     | 1.842105263                  | 0.013122922            | 0.542857143          | 0.547368421            |
| 20 | CDK1   | 20     | 1.907894737                  | 0.021354067            | 0.524137931          | 0.478947368            |
| 21 | JAK2   | 18     | 1.855263158                  | 0.003380625            | 0.539007092          | 0.745098039            |
| 22 | HDAC6  | 18     | 1.894736842                  | 0.047889922            | 0.527777778          | 0.333333333            |
| 23 | IGF1R  | 18     | 1.881578947                  | 0.001286908            | 0.531468531          | 0.830065359            |
| 24 | KDR    | 17     | 1.907894737                  | 0.004594691            | 0.524137931          | 0.691176471            |
| 25 | MMP3   | 15     | 1.934210526                  | 0.022575186            | 0.517006803          | 0.485714286            |
| 26 | F2     | 15     | 1.973684211                  | 0.022480299            | 0.506666667          | 0.380952381            |
| 27 | HDAC2  | 13     | 2.078947368                  | 0.009649474            | 0.481012658          | 0.525641026            |
| 28 | CTSB   | 13     | 2.065789474                  | 0.011325768            | 0.484076433          | 0.371794872            |
| 29 | CDK5   | 13     | 2.026315789                  | 0.00512819             | 0.493506494          | 0.58974359             |
| 30 | PRKDC  | 13     | 2.223684211                  | 0.007280656            | 0.449704142          | 0.423076923            |
| 31 | ABCB1  | 12     | 2.013157895                  | 0.008941845            | 0.496732026          | 0.575757576            |
| 32 | TYMS   | 12     | 2.263157895                  | 0.018326529            | 0.441860465          | 0.5                    |
| 33 | KNG1   | 12     | 2.092105263                  | 0.018132579            | 0.477987421          | 0.363636364            |
| 34 | AURKA  | 12     | 2.171052632                  | 0.00475996             | 0.460606061          | 0.575757576            |

|    |         |    |             |             |             |             |
|----|---------|----|-------------|-------------|-------------|-------------|
| 35 | DHFR    | 11 | 2.263157895 | 0.014802904 | 0.441860465 | 0.472727273 |
| 36 | SYK     | 11 | 2.052631579 | 0.001335473 | 0.487179487 | 0.745454545 |
| 37 | PIK3CD  | 11 | 2.131578947 | 0.000682    | 0.469135802 | 0.818181818 |
| 38 | AGTR1   | 10 | 2.026315789 | 0.001601436 | 0.493506494 | 0.688888889 |
| 39 | CTSL    | 10 | 2.236842105 | 0.002798608 | 0.447058824 | 0.511111111 |
| 40 | RPS6KA3 | 10 | 2.039473684 | 0.000475    | 0.490322581 | 0.866666667 |
| 41 | MAPK9   | 10 | 2.039473684 | 0.001607833 | 0.490322581 | 0.777777778 |
| 42 | MAP3K7  | 10 | 2.184210526 | 0.001939282 | 0.457831325 | 0.577777778 |
| 43 | MAPK10  | 9  | 2.157894737 | 0.000569    | 0.463414634 | 0.833333333 |
| 44 | CAPN1   | 9  | 2.105263158 | 0.006371526 | 0.475       | 0.333333333 |
| 45 | CDK9    | 9  | 2.302631579 | 0.000759    | 0.434285714 | 0.75        |
| 46 | ELANE   | 9  | 2.368421053 | 0.00439699  | 0.422222222 | 0.5         |
| 47 | PDPK1   | 9  | 2.184210526 | 0.001066589 | 0.457831325 | 0.666666667 |
| 48 | ADAM17  | 8  | 2.092105263 | 0.000174    | 0.477987421 | 0.857142857 |
| 49 | CDK5R1  | 8  | 2.355263158 | 0.001450666 | 0.424581006 | 0.571428571 |
| 50 | CDK7    | 8  | 2.381578947 | 0.000189    | 0.419889503 | 0.857142857 |
| 51 | PLAT    | 8  | 2.289473684 | 0.004174091 | 0.436781609 | 0.535714286 |
| 52 | MMP13   | 7  | 2.315789474 | 0.001192613 | 0.431818182 | 0.523809524 |
| 53 | CTSK    | 7  | 2.263157895 | 0.001102356 | 0.441860465 | 0.761904762 |
| 54 | PAK4    | 7  | 2.184210526 | 0.000661    | 0.457831325 | 0.571428571 |
| 55 | HDAC3   | 6  | 2.210526316 | 0.002761501 | 0.452380952 | 0.666666667 |
| 56 | CFTR    | 6  | 2.210526316 | 0.007287819 | 0.452380952 | 0.266666667 |
| 57 | PDE4D   | 6  | 2.210526316 | 0.025879498 | 0.452380952 | 0.333333333 |
| 58 | FNTA    | 5  | 2.394736842 | 0.000934    | 0.417582418 | 0.5         |
| 59 | ABCC1   | 5  | 2.460526316 | 0.0000501   | 0.406417112 | 0.9         |
| 60 | PDE10A  | 5  | 2.460526316 | 0.030492877 | 0.406417112 | 0.3         |
| 61 | TGM2    | 5  | 2.263157895 | 0.000547    | 0.441860465 | 0.7         |
| 62 | HDAC11  | 5  | 2.618421053 | 0.001518229 | 0.381909548 | 0.7         |
| 63 | MYLK    | 5  | 2.236842105 | 0.000134    | 0.447058824 | 0.9         |
| 64 | ADORA1  | 4  | 2.289473684 | 0.001456925 | 0.436781609 | 0.5         |
| 65 | TTK     | 4  | 2.618421053 | 0           | 0.381909548 | 1           |
| 66 | F10     | 4  | 2.776315789 | 0.000326    | 0.360189573 | 0.666666667 |
| 67 | ADORA2A | 3  | 2.447368421 | 0.002355568 | 0.408602151 | 0.333333333 |
| 68 | KLKB1   | 3  | 2.789473684 | 0.000501    | 0.358490566 | 0.666666667 |
| 69 | PDE2A   | 3  | 3.131578947 | 0.001756639 | 0.319327731 | 0.666666667 |
| 70 | CCKBR   | 2  | 2.421052632 | 0.026315789 | 0.413043478 | 0           |
| 71 | PFKFB3  | 2  | 2.526315789 | 0           | 0.395833333 | 1           |
| 72 | DHODH   | 2  | 3.197368421 | 0           | 0.312757202 | 1           |
| 73 | HDAC8   | 2  | 2.868421053 | 0           | 0.348623853 | 1           |

|    |                     |   |             |   |             |   |
|----|---------------------|---|-------------|---|-------------|---|
| 74 | PDE5A               | 2 | 3.434210526 | 0 | 0.291187739 | 1 |
| 75 | CCKAR               | 1 | 3.407894737 | 0 | 0.293436293 | 0 |
| 76 | DRD4                | 1 | 2.447368421 | 0 | 0.408602151 | 0 |
| 77 | PLA2G7              | 1 | 2.657894737 | 0 | 0.376237624 | 0 |
| 78 | ADRA1A <sup>a</sup> | 0 | 0           | 0 | 0           | 0 |

<sup>a</sup>= Did not form any interaction
